# Supplementary material for: One-pot synthesis of iron-doped ceria catalysts for tandem carbon dioxide hydrogenation
Source: Royal Society of Chemistry journal article supplement (doi:10.1039/d4cy00439f), 2024-01-01
Supplement: d4cy00439f1.pdf [file d4cy00439f1.pdf]

Electronic Supporting Information of

# One-pot synthesis of iron-doped ceria catalysts for tandem carbon dioxide hydrogenation

*Albert Gili, Maged Bekheet, Franziska Thimm, Benjamin Bischoff, Michael Geske, Martin  
Konrad, Sebastian Prätz, Christopher Schlesiger, Sören Selve, Aleksander Gurlo, Frank  
Rosowski, Reinhard Schomäcker*

This supporting information contains figures S1 to S14, and tables S1 to S3.

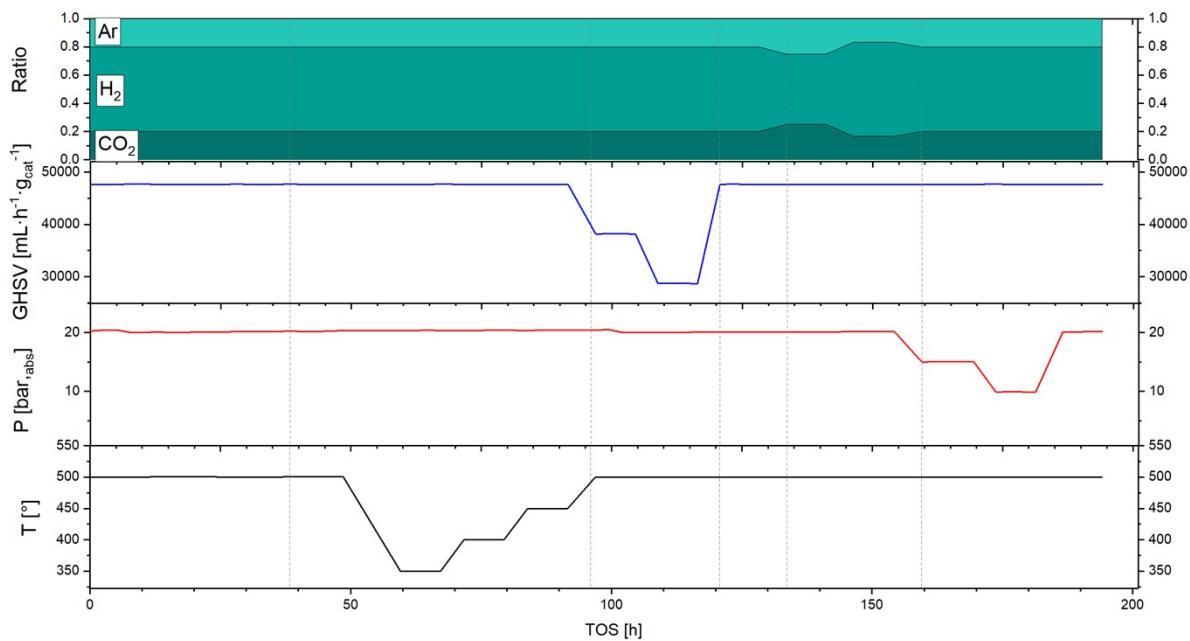

Figure S1. Graph with reactant ratio, GHSV, P and T as function of the TOS. The sensor real values for only reactor 1 are displayed to simplify visualization. Reactors 2 to 4 are not displayed but each data point (for the same conditions in between reactors) is approx. 30 min away from each other due to the GC analysis time.

Table S1. Full test conditions table. ~50 mg catalyst is loaded in each reactor. These include an initial reduction step (0) followed by an activation step/reference step (1), temperature variation (2-4), GHSV variation (5-6), reference (7), gas ratio variation (8-9), pressure variation (10-11), and a final reference step (12). All the reference steps are performed at the same operating conditions and allow assessing the performance stability.

| Step |           | GSHV                                               | X <sub>H2</sub> | X <sub>CO2</sub> | X <sub>N2</sub> | T   | P          |
|------|-----------|----------------------------------------------------|-----------------|------------------|-----------------|-----|------------|
|      |           | mL·h <sup>-1</sup> ·g <sub>cat</sub> <sup>-1</sup> | %               | %                | %               | °C  | Bar, (abs) |
| 0    | Reduction | 40000                                              | 10              | 0                | 90              | 500 | 20         |
| 1    | Ref.      | 50000                                              | 60              | 20               | 20              | 500 | 20         |
| 2    |           | 50000                                              | 60              | 20               | 20              | 350 | 20         |
| 3    | Temp.     | 50000                                              | 60              | 20               | 20              | 400 | 20         |
| 4    |           | 50000                                              | 60              | 20               | 20              | 450 | 20         |
| 5    |           | 40000                                              | 60              | 20               | 20              | 500 | 20         |
| 6    | GHSV      | 30000                                              | 60              | 20               | 20              | 500 | 20         |
| 7    | Ref.      | 50000                                              | 60              | 20               | 20              | 500 | 20         |
| 8    |           | 50000                                              | 50              | 25               | 25              | 500 | 20         |
| 9    | Ratio     | 50000                                              | 67              | 17               | 17              | 500 | 20         |
| 10   |           | 50000                                              | 60              | 20               | 20              | 500 | 15         |
| 11   | Pressure  | 50000                                              | 60              | 20               | 20              | 500 | 10         |
| 12   | Ref.      | 50000                                              | 60              | 20               | 20              | 500 | 20         |

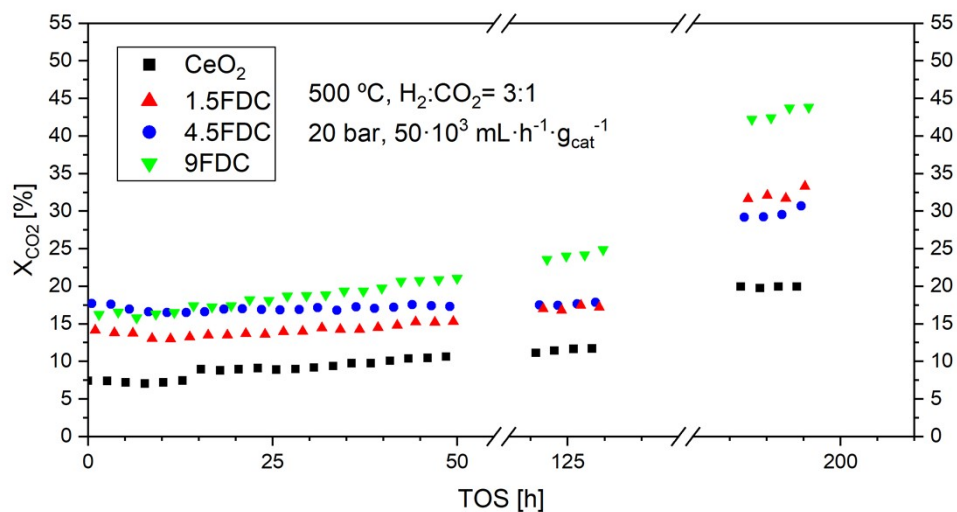

Figure S2. Conversion of CO<sub>2</sub> with TOS for all the catalysts. The conditions are: 500 °C, H<sub>2</sub>:CO<sub>2</sub>:Ar=3:1:1, 20 bar and 50,000 mL · h<sup>-1</sup> · g<sub>cat</sub><sup>-1</sup>. Although not strictly a stability test, this experiment shows the change in the conversion of CO<sub>2</sub> over the full tested period.

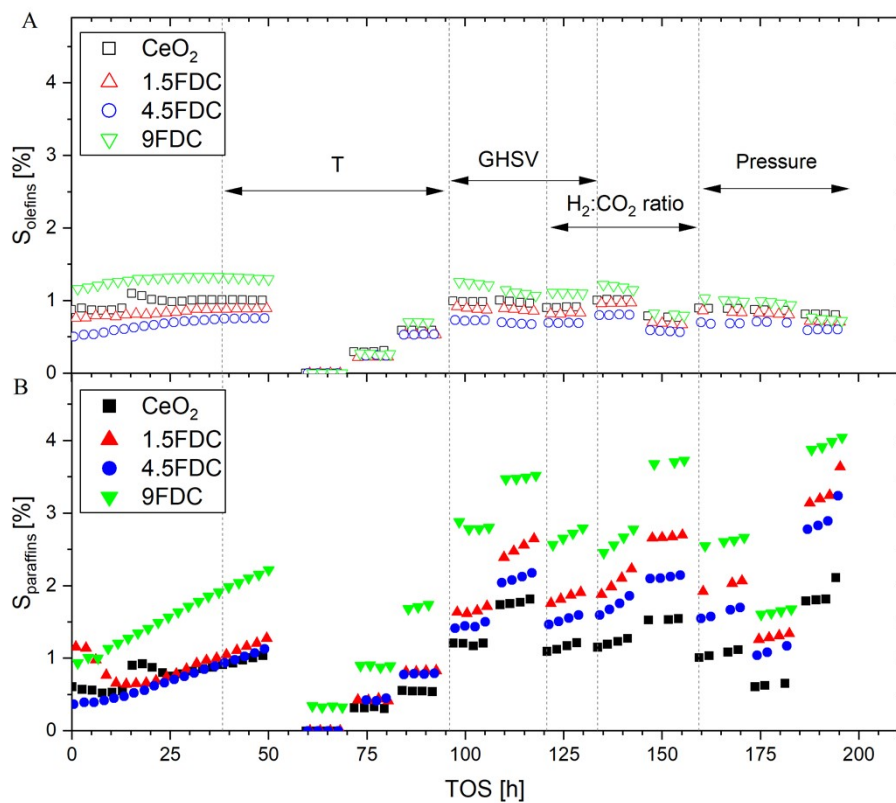

Figure S3. Selectivity toward C2-C4 olefins (top panel) and paraffins (bottom panel) for all samples as function of TOS.

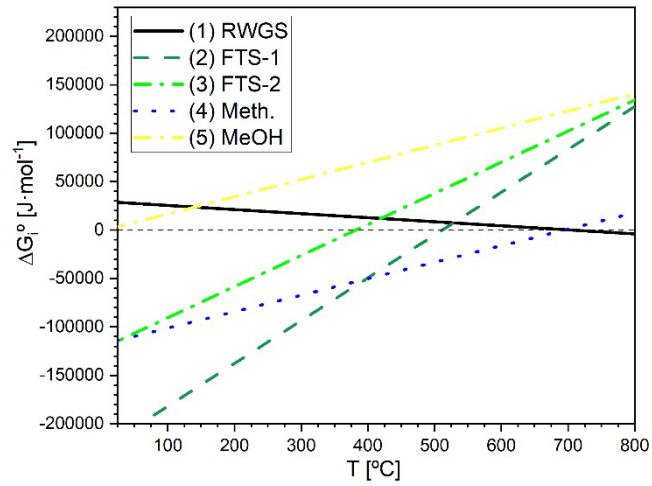

Figure S4. Gibbs free energy as function of the temperature for reactions 1-5. Reaction 1- RWGS,  $\text{CO}_2 + \text{H}_2 \leftrightarrow \text{H}_2\text{O} + \text{CO}$ ; Reaction 2-FTS-1,  $5\text{H}_2 + 2\text{CO} \leftrightarrow \text{C}_2\text{H}_6 + 2\text{H}_2\text{O}$ ; Reaction 3-FTS-2,  $4\text{H}_2 + 2\text{CO} \leftrightarrow \text{C}_2\text{H}_4 + 2\text{H}_2\text{O}$ ; Reaction 4-Meth,  $4\text{H}_2 + \text{CO}_2 \leftrightarrow \text{CH}_4 + 2\text{H}_2\text{O}$ ; Reaction 5-MeOH,  $3\text{H}_2 + \text{CO}_2 \leftrightarrow \text{CH}_3\text{OH} + \text{H}_2\text{O}$

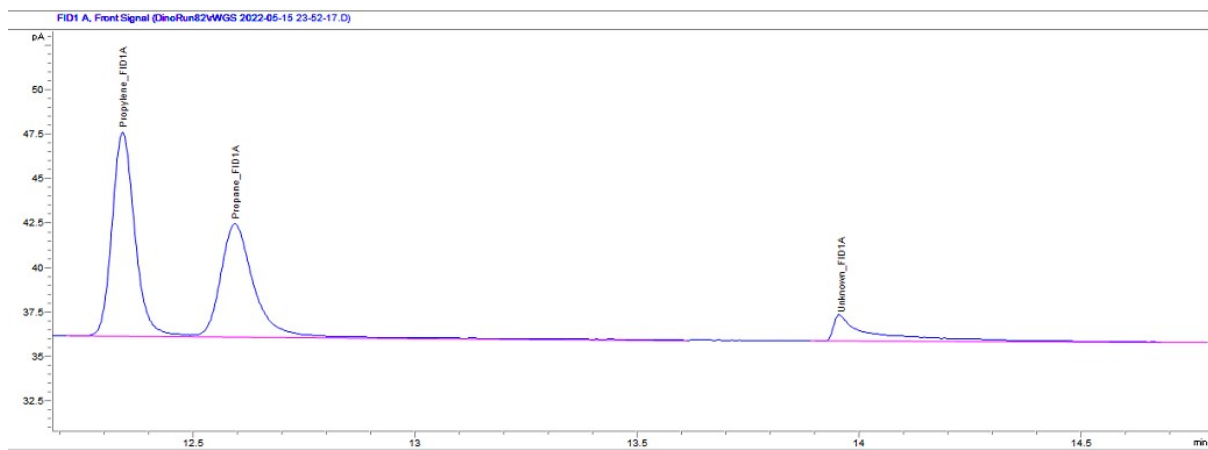

*Figure S5. Unidentified peak detected during GC analysis. The quantified species in the GC were carbon dioxide, carbon monoxide, hydrogen, nitrogen, argon, methane, ethane, propane, n-butane, n-pentane, n-hexane, n-heptane, ethylene, propylene, n-butane, methanol, ethanol, n-propanol, n-butanol, dimethyl ether, acetaldehyde, propanal, butanal, formic acid, acetic acid, Methylformate, methylacetate, and ethylacetate.*

Table S2. Iron concentration obtained with ICP-OES, wt.% of S obtained with the combustion method, and specific surface area obtained with N<sub>2</sub>-adsorption BET for all the fresh samples.

| <b>Sample</b>    | <b>Fe mol%</b> | <b>S wt.%</b> | <b>SSA [m<sup>2</sup>·g<sup>-1</sup>]</b> |
|------------------|----------------|---------------|-------------------------------------------|
| CeO <sub>2</sub> | 0.042          | 0.020         | 4.5                                       |
| 1.5FDC           | 1.36           | 0.019         | 14.7                                      |
| 4.5FDC           | 4.20           | 0.024         | 14.1                                      |
| 9FDC             | 8.77           | 0.020         | 10.6                                      |



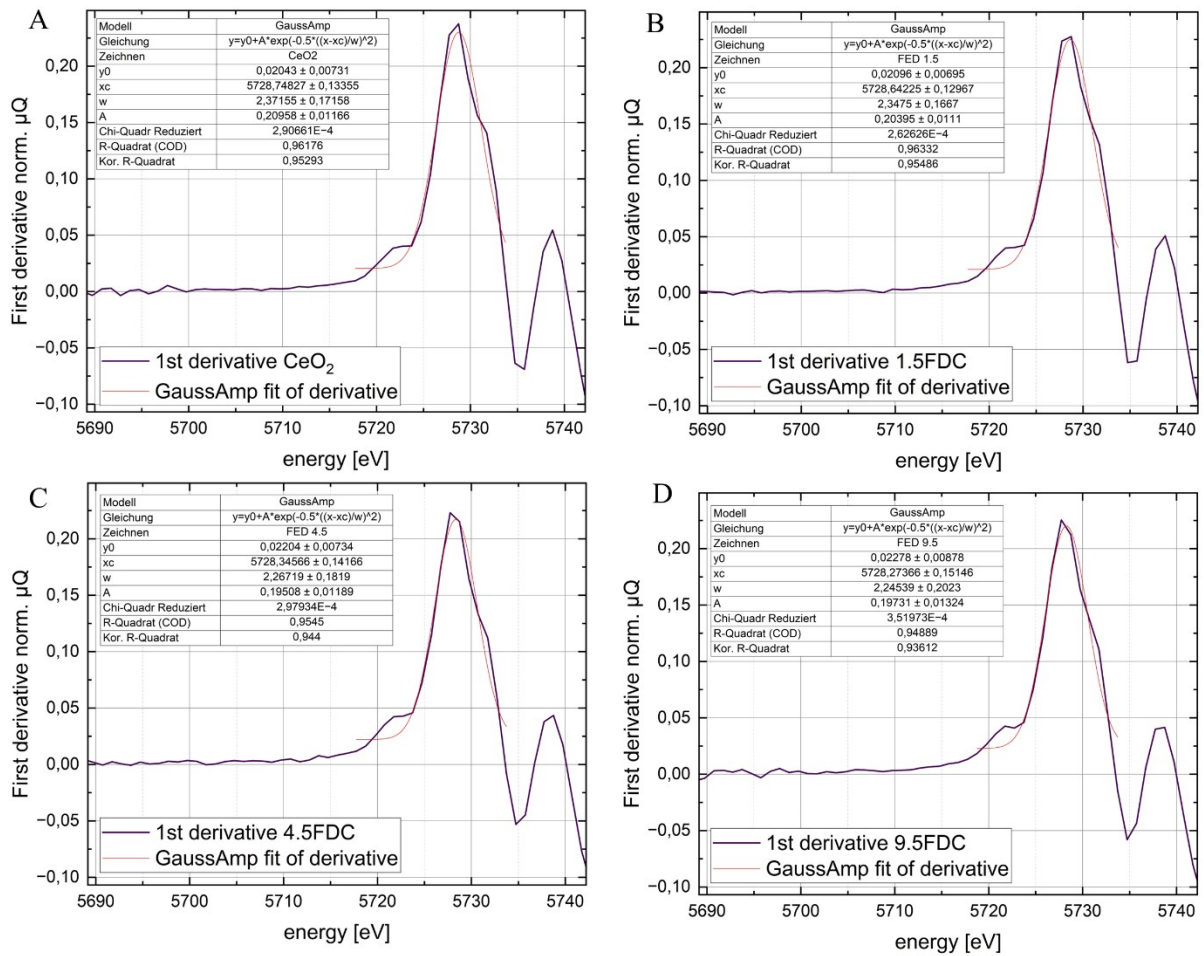

Figure S6. Fitting results of the Ce L<sub>3</sub> X-ray absorption data shown in figure 3 of the manuscript. The 1<sup>st</sup> derivate of the edge was fitted using a Gaussian function. The specified uncertainty of the edge positions is the std. of the gaussian fits. The 1st derivative was fitted with a Gaussian fit in the energy range of 5716 to 5734 by using Origin2020

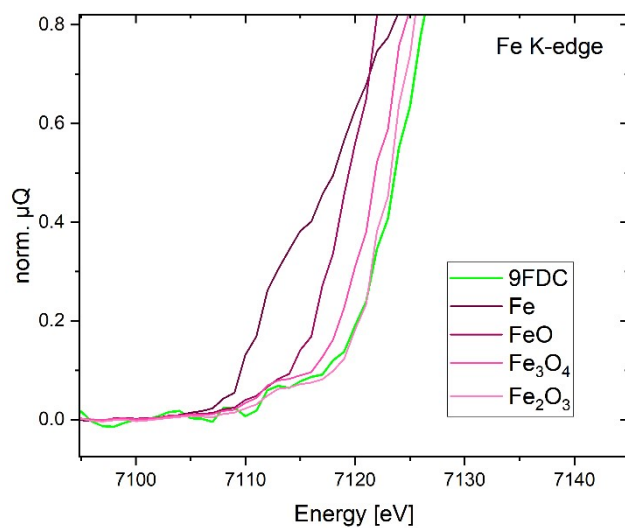

*Figure S7. Pre-edge XANES spectra of the Fe K-edge of the 9FDC sample and the reference materials. The best match clearly occurs with the  $Fe^{3+}$  reference material.*

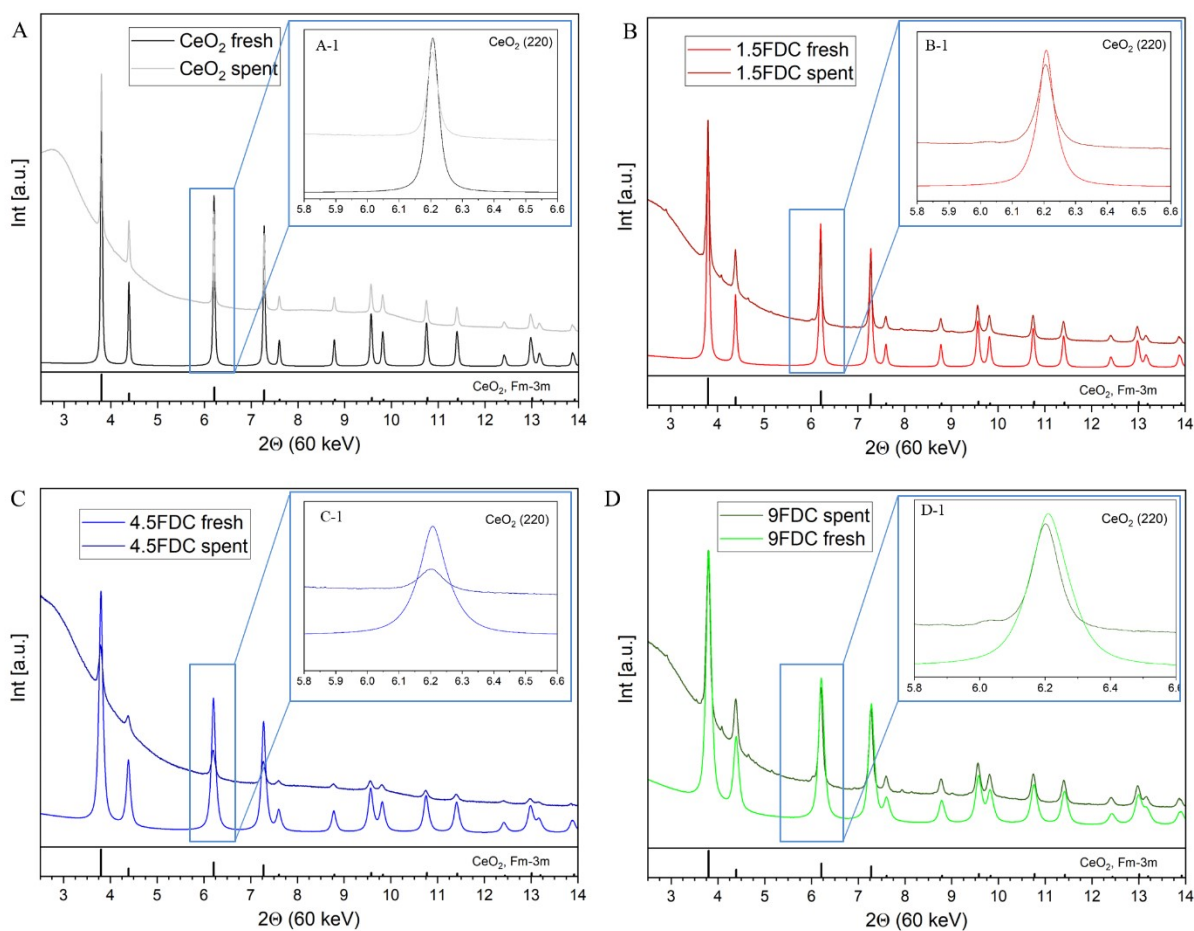

Figure S8. XRD data of the fresh and spent samples with (insight) magnification of the  $\text{CeO}_2(220)$  reflection. All the data has been normalized. The spent 4.5FDC sample yielded particularly low counts due to few present catalyst grains in the analyzed sample. All data was acquired at 60 keV and with time expositions between 60 and 180 s.

Table S3. Rietveld refinement of the XRD data.

| Sample           | Space group  | Fresh sample          |                       | Spent sample          |                       |
|------------------|--------------|-----------------------|-----------------------|-----------------------|-----------------------|
|                  |              | Lattice parameter [Å] | Crystallite size [nm] | Lattice parameter [Å] | Crystallite size [nm] |
| CeO <sub>2</sub> | <i>Fm-3m</i> | 5.4115(2)             | 23.6                  | 5.4130(2)             | 31.6                  |
| 1.5FDC           | <i>Fm-3m</i> | 5.4106(2)             | 13.7                  | 5.4135(2)             | 15.1                  |
| 4.5FDC           | <i>Fm-3m</i> | 5.4101(2)             | 7.5                   | 5.4162(2)             | 10.0                  |
| 9FDC             | <i>Fm-3m</i> | 5.4067(2)             | 5.8                   | 5.4155(2)             | 9.5                   |

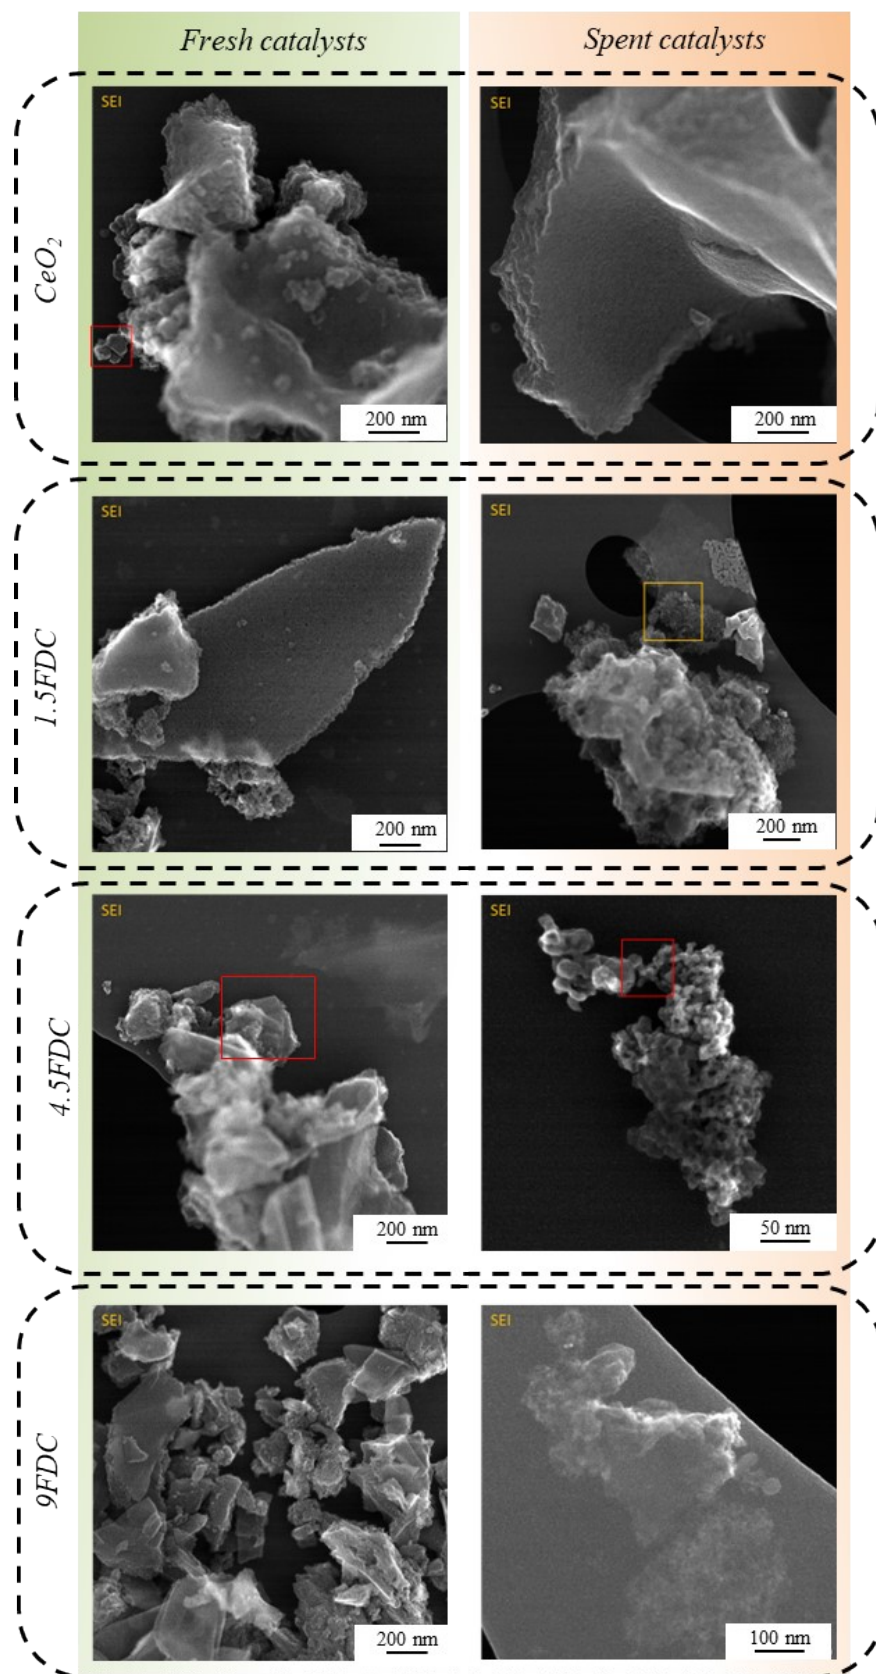

Figure S9. STEM images of the samples at lower magnification. If present, the colored frames highlight the regions displayed in the figure 5 of the main manuscript.

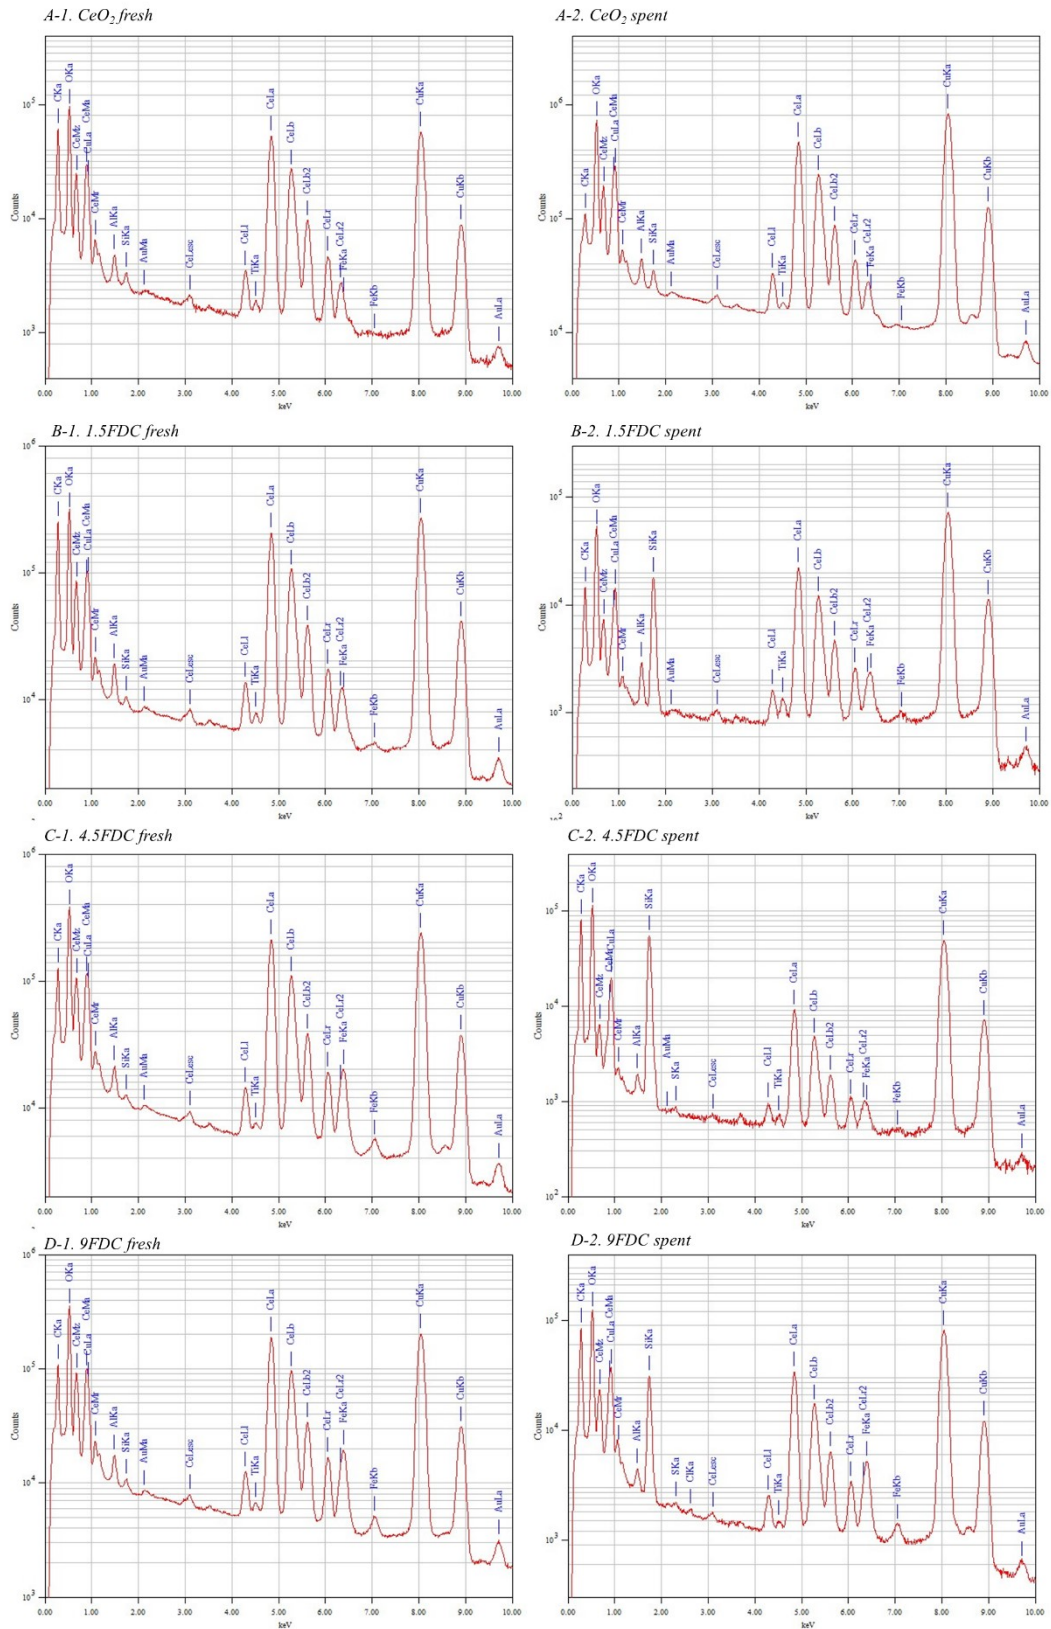

Figure S10. EDX spectra of all the fresh and spent samples shown in figure 5 of the manuscript.



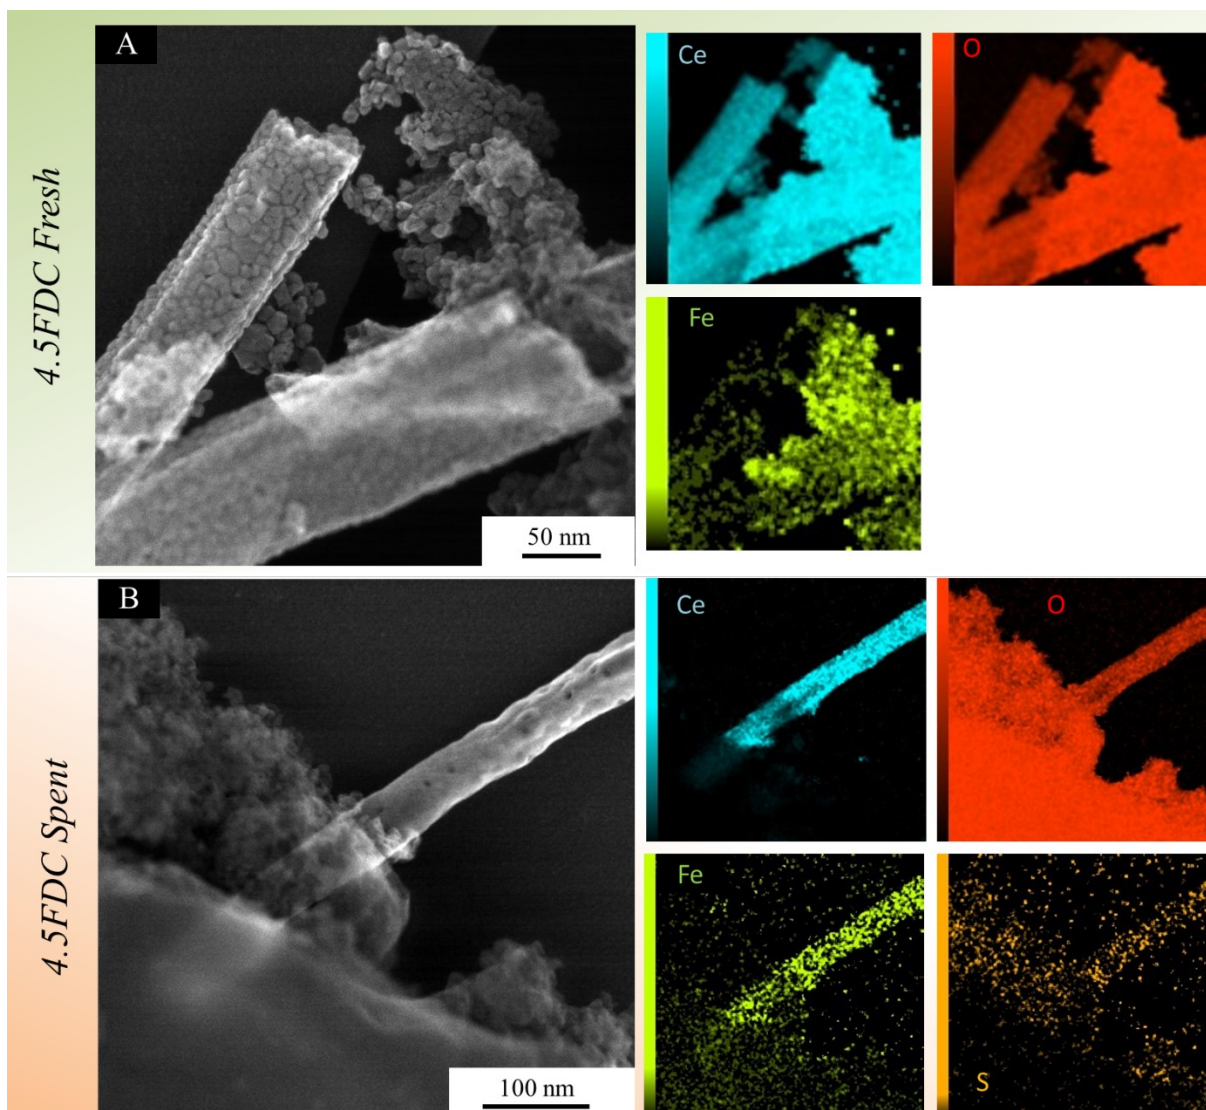

Figure S11. 4.5FDC STEM. No S was detected in the fresh sample, whereas 0.9 wt.% S was detected in the spent catalyst.

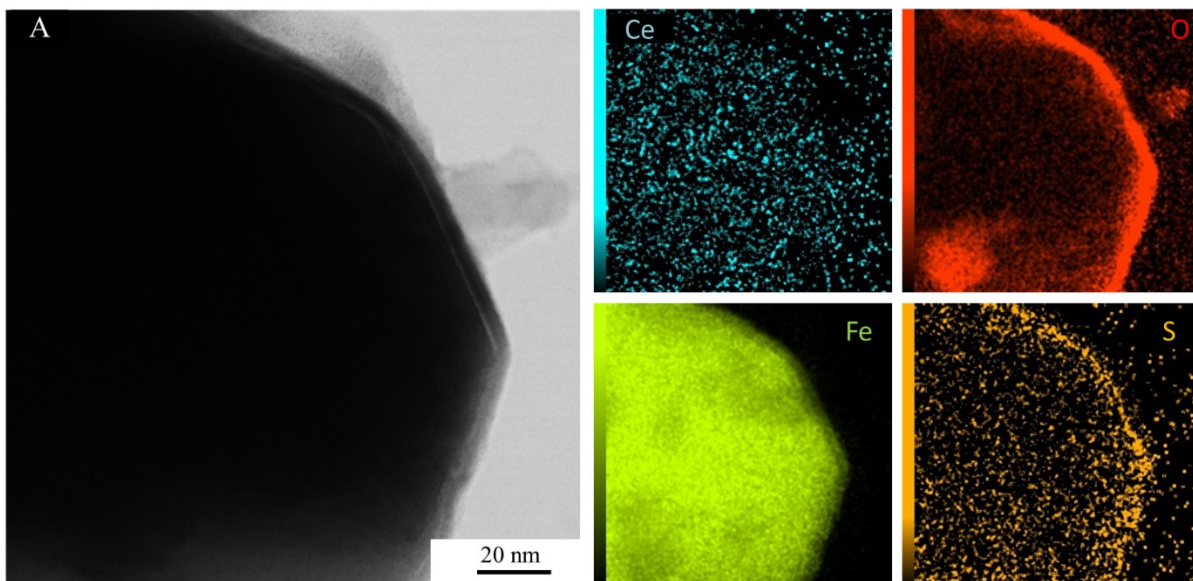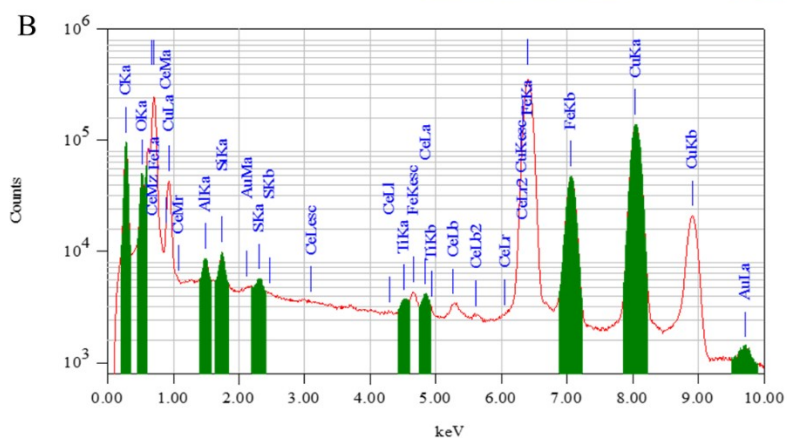

Figure S12. STEM-BF of the spent 4.5FDC showing an exsolved particle. The same type of structure as for the 9FDC sample described in the main manuscript is observed. In this case, a S-content of 0.14 wt.% and Ce of 0.89 wt.% are quantified. EDX spectra (panel B) and mapping.



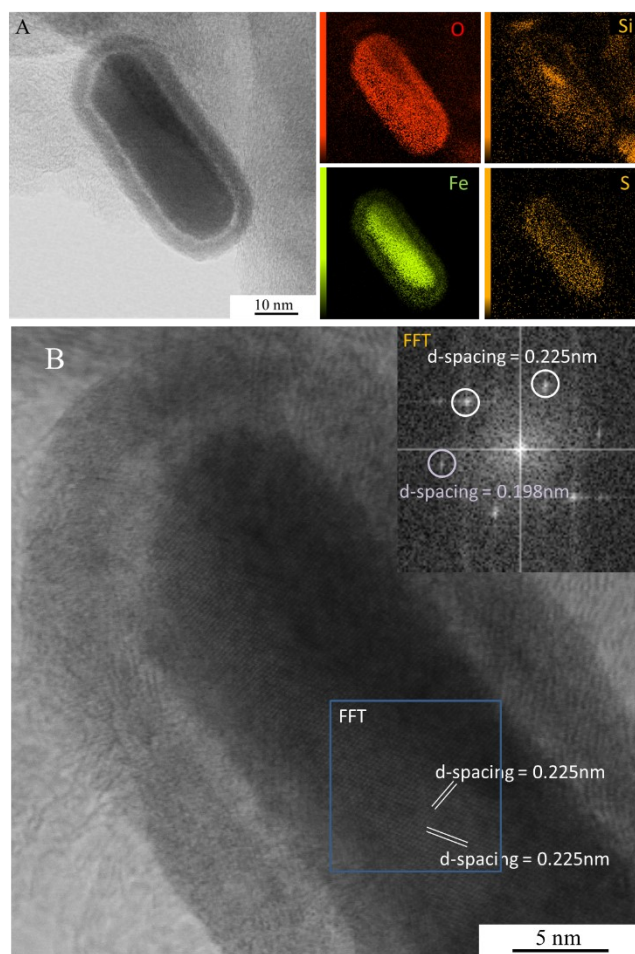

Figure S13. HR-STEM-BF of the spent 9FDC. Panel A: view of the core-shell particle and EDX elemental mapping. The quantitative analysis yields contents of 32.62 %wt. (O), 3.17 %wt. (Si), 0.73 %wt. (S) and 63.47 %wt. (Fe). Panel B: FFT of the core of the particle showing d-spacings of 0.225 nm and 0.198 nm. The angles between both 0.225 nm reflections is measured to  $68.6^\circ$  and between 0.225 nm and 0.198 nm is measured to  $53.6^\circ$  (resp.  $57.6^\circ$  for the opposite reflection).

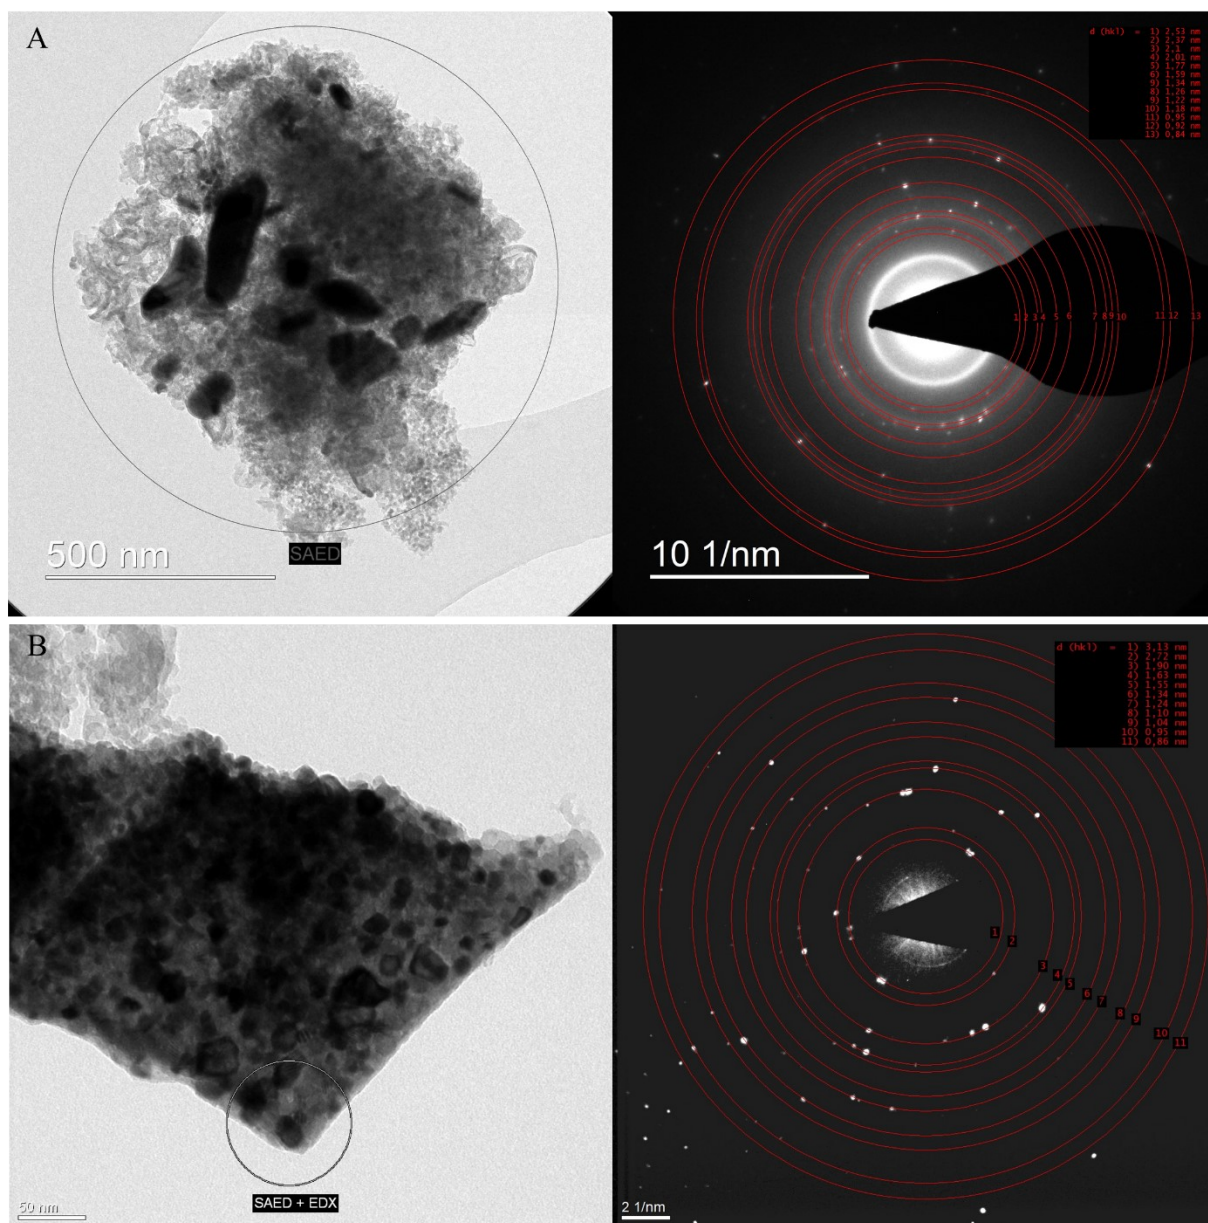

Figure S14. TEM imaging of the 9FDC spent catalyst (left column) with SAED (right column) of the areas highlighted. Panel A allows to identify the interplanar distances of  $\text{Fe}_3\text{C}$  (*Pnma*, PDF 00-035-0772) phase, whereas Panel B reflections fit the  $\text{CeO}_2$  (*Fm-3m*, 00-034-0394) phase.
